# Supplementary material
Source: publisher site journal article supplement (https://www.dovepress.com/article/348738)
Supplement: Supplementary file 1 [file get_supplementary_file.php]

## Supplementary materials

**Supplementary Table 1.** Fold changes in expression levels of proteins enriched in regulation of inflammatory response significantly changed by DTMP.

| Protein Name | Fold Changes       |                  |                    | p-value            |                  |                    |
|--------------|--------------------|------------------|--------------------|--------------------|------------------|--------------------|
|              | No-SCS :<br>No-SNI | DTMP :<br>No-SCS | LR-SCS :<br>No-SCS | No-SCS :<br>No-SNI | DTMP :<br>No-SCS | LR-SCS :<br>No-SCS |
| ORM1         | 2.04               | 0.22             | 0.53               | 1.1E-03            | 8.9E-04          | 7.4E-03            |
| SERPINA3N    | 1.96               | 0.28             | 0.48               | 6.8E-04            | 3.9E-04          | 9.9E-04            |
| ITIH4        | 1.80               | 0.32             | 0.46               | 8.1E-07            | 2.8E-08          | 5.4E-07            |
| C5           | 1.54               | 0.34             | 0.50               | 3.8E-07            | 1.0E-07          | 3.0E-07            |
| LBP          | 1.44               | 0.29             | 0.73               | 2.6E-04            | 2.4E-04          | 1.6E-03            |
| SERPINC1     | 1.41               | 0.40             | 0.60               | 3.1E-02            | 2.4E-03          | 2.0E-02            |
| HP           | 1.40               | 0.59             | 0.85               | 1.7E-03            | 3.8E-04          | 2.0E-01            |
| C3           | 1.40               | 0.39             | 0.57               | 3.7E-13            | 1.3E-28          | 2.9E-23            |
| CFH          | 1.37               | 0.39             | 0.64               | 2.9E-05            | 1.3E-07          | 1.6E-05            |
| IQGAP1       | 1.30               | 0.55             | 0.72               | 1.3E-07            | 1.3E-08          | 7.5E-07            |
| TF           | 1.28               | 0.45             | 0.60               | 1.1E-08            | 4.1E-21          | 6.6E-15            |
| TCIRG1       | 1.28               | 0.59             | 0.73               | 5.4E-03            | 1.6E-02          | 5.0E-02            |
| APOE         | 1.27               | 0.53             | 0.58               | 4.7E-06            | 8.1E-09          | 5.2E-06            |
| NG2          | 1.24               | 0.81             | 0.83               | 1.1E-04            | 1.4E-03          | 1.4E-03            |
| CNTF         | 1.23               | 0.46             | 0.88               | 2.7E-02            | 9.5E-04          | 1.3E-01            |
| PROTHROMBIN  | 1.22               | 0.42             | 0.57               | 3.0E-02            | 3.3E-05          | 5.9E-04            |
| TGFBI        | 1.22               | 0.50             | 0.67               | 1.2E-01            | 7.8E-06          | 4.4E-03            |
| ASS1         | 1.22               | 0.80             | 0.76               | 1.7E-03            | 5.0E-04          | 9.5E-04            |
| PYCARD       | 1.21               | 0.63             | 1.15               | 1.2E-02            | 2.2E-03          | 2.6E-02            |
| VIMENTIN     | 1.17               | 0.47             | 0.70               | 7.7E-05            | 1.1E-17          | 7.1E-06            |
| P47PHOX      | 1.16               | 0.51             | 1.00               | 3.9E-02            | 6.7E-04          | 8.9E-01            |
| TXNIP        | 1.16               | 0.64             | 0.85               | 1.2E-01            | 2.3E-02          | 6.6E-02            |
| NRG1         | 1.15               | 0.46             | 0.60               | 2.0E-02            | 7.8E-06          | 3.6E-05            |
| IP3R3        | 1.14               | 0.54             | 0.77               | 8.4E-02            | 2.3E-03          | 2.5E-02            |
| IP3R1 iso 3  | 1.11               | 0.70             | 0.84               | 2.3E-02            | 3.6E-04          | 4.9E-03            |
| GGT5         | 1.11               | 0.92             | 0.98               | 1.5E-01            | 6.6E-03          | 8.9E-01            |
| SERPINA1     | 1.11               | 0.44             | 0.66               | 2.0E-01            | 3.9E-07          | 1.9E-03            |
| A2M          | 1.09               | 0.30             | 0.48               | 1.7E-01            | 1.6E-06          | 7.4E-06            |
| CASP3        | 1.08               | 0.74             | 0.88               | 2.3E-01            | 3.7E-02          | 3.2E-01            |
| IP3R2        | 1.07               | 0.83             | 1.00               | 1.1E-01            | 7.0E-03          | 8.1E-01            |
| CSRP1        | 1.06               | 0.76             | 0.75               | 2.5E-01            | 6.9E-03          | 2.0E-02            |
| KIR4.1       | 1.05               | 1.18             | 0.95               | 4.1E-01            | 2.6E-02          | 5.9E-01            |
| FETUA        | 1.04               | 0.47             | 0.59               | 6.5E-01            | 4.5E-05          | 1.4E-03            |
| KLKB1        | 1.04               | 0.52             | 0.63               | 8.0E-01            | 1.1E-02          | 2.4E-02            |
| CHI3L1 iso 2 | 1.03               | 0.43             | 0.72               | 8.0E-01            | 4.9E-02          | 1.3E-02            |
| AIFM3        | 1.02               | 1.13             | 0.94               | 7.0E-01            | 3.0E-02          | 5.3E-01            |
| C4A          | 1.02               | 0.66             | 0.98               | 5.7E-01            | 2.3E-12          | 8.5E-01            |
| STAT3        | 1.01               | 0.87             | 1.02               | 8.0E-01            | 4.6E-02          | 4.2E-01            |
| CASK         | 1.01               | 1.11             | 1.11               | 8.9E-01            | 1.7E-03          | 5.0E-02            |
| MUG1         | 1.01               | 0.52             | 0.60               | 8.0E-01            | 6.6E-20          | 1.8E-16            |
| HK1          | 1.00               | 1.04             | 0.92               | 8.6E-01            | 1.0E-02          | 1.1E-01            |

|              |      |      |      |         |         |         |
|--------------|------|------|------|---------|---------|---------|
| PMCA4 iso2   | 1.00 | 1.09 | 1.00 | 8.6E-01 | 3.3E-04 | 7.0E-01 |
| SORL1        | 0.99 | 1.12 | 1.00 | 7.3E-01 | 1.5E-03 | 7.0E-01 |
| HMGB2        | 0.98 | 0.60 | 0.76 | 5.4E-01 | 2.7E-02 | 5.2E-02 |
| TRAF3        | 0.97 | 1.08 | 0.99 | 2.5E-01 | 1.2E-05 | 9.5E-01 |
| NFAT90       | 0.96 | 1.09 | 1.00 | 4.2E-01 | 2.2E-02 | 7.7E-01 |
| PRCP         | 0.96 | 1.10 | 1.17 | 6.4E-01 | 1.5E-03 | 1.3E-01 |
| CAMK2B iso 2 | 0.96 | 1.14 | 1.01 | 1.4E-01 | 7.0E-06 | 4.5E-01 |
| CMTFR        | 0.96 | 1.09 | 0.95 | 6.3E-01 | 4.1E-02 | 7.0E-01 |
| SERPINB1A    | 0.96 | 1.20 | 1.37 | 6.5E-01 | 5.6E-03 | 5.5E-04 |
| ANXA1        | 0.96 | 0.38 | 0.52 | 4.7E-01 | 2.2E-07 | 6.0E-06 |
| CAMK2G       | 0.96 | 1.12 | 0.98 | 4.1E-01 | 1.3E-02 | 9.3E-01 |
| HMGB1        | 0.95 | 0.86 | 0.92 | 3.2E-01 | 2.1E-02 | 1.0E-01 |
| STMN2        | 0.94 | 1.25 | 1.29 | 4.0E-01 | 5.0E-02 | 1.0E-01 |
| nNOS         | 0.94 | 1.15 | 1.13 | 1.7E-01 | 2.0E-03 | 4.3E-02 |
| ITGB2        | 0.94 | 0.75 | 1.22 | 2.7E-01 | 1.6E-03 | 4.5E-03 |
| PMCA1        | 0.94 | 1.10 | 1.11 | 7.4E-02 | 6.1E-04 | 6.8E-03 |
| CASKIN1      | 0.93 | 1.17 | 1.11 | 1.4E-03 | 5.7E-07 | 7.6E-03 |
| ECM1         | 0.92 | 0.58 | 0.77 | 3.3E-01 | 4.2E-02 | 1.0E-01 |
| APP          | 0.92 | 1.06 | 1.08 | 1.6E-02 | 6.2E-03 | 3.3E-02 |
| CAMK2D       | 0.92 | 1.16 | 1.10 | 7.8E-02 | 1.4E-03 | 7.5E-02 |
| CLU          | 0.90 | 0.85 | 1.05 | 4.2E-02 | 2.2E-02 | 2.7E-01 |
| PDCD8        | 0.87 | 1.19 | 1.08 | 1.6E-03 | 6.4E-04 | 4.4E-02 |
| CAMK2A       | 0.85 | 1.24 | 1.17 | 1.2E-03 | 2.5E-05 | 3.7E-03 |
| PTN          | 0.85 | 1.13 | 0.95 | 2.1E-01 | 4.3E-02 | 7.4E-01 |
| SCN9A        | 0.82 | 1.27 | 1.42 | 2.6E-01 | 3.5E-02 | 2.9E-02 |
| VDAC2        | 0.81 | 1.20 | 1.15 | 1.2E-02 | 3.3E-03 | 5.3E-02 |
| THBS1        | 0.80 | 0.42 | 0.67 | 7.4E-04 | 2.6E-05 | 9.0E-05 |
| S100A9       | 0.79 | 0.81 | 0.35 | 2.5E-01 | 3.2E-02 | 3.2E-03 |
| FN1          | 0.78 | 0.37 | 0.67 | 7.4E-13 | 1.1E-21 | 4.8E-14 |
| PF4          | 0.76 | 0.43 | 0.72 | 2.5E-02 | 1.3E-02 | 2.9E-02 |
| VDAC1        | 0.74 | 1.29 | 1.24 | 9.2E-04 | 2.3E-04 | 7.0E-03 |
| RAP1A        | 0.71 | 1.32 | 1.39 | 1.5E-02 | 2.4E-03 | 6.4E-03 |
| VDAC3        | 0.71 | 1.29 | 1.25 | 2.5E-04 | 2.9E-04 | 7.3E-03 |
| PLP1         | 0.70 | 1.34 | 1.26 | 1.2E-14 | 1.3E-05 | 1.6E-03 |
| TAC1         | 0.69 | 1.53 | 2.08 | 2.4E-02 | 8.4E-03 | 9.3E-03 |
| CALCA        | 0.67 | 1.94 | 1.84 | 4.6E-03 | 2.8E-03 | 9.0E-02 |
| S100A8       | 0.58 | 0.19 | 0.18 | 7.4E-03 | 8.6E-03 | 4.9E-03 |
| ELANE        | 0.52 | 0.27 | 0.39 | 2.3E-03 | 1.1E-02 | 1.6E-02 |
| FGA iso 1    | 0.52 | 0.32 | 0.70 | 4.1E-16 | 6.7E-19 | 2.2E-07 |
| CAMP         | 0.48 | 0.25 | 0.45 | 5.1E-02 | 4.5E-02 | 4.6E-02 |

**Supplementary Table 2.** Fold changes in expression levels of proteins enriched in regulation of MAPK cascade significantly changed by DTMP.

| Protein Name | Fold Changes       |                  |                    | p-value            |                  |                    |
|--------------|--------------------|------------------|--------------------|--------------------|------------------|--------------------|
|              | No-SCS :<br>No-SNI | DTMP :<br>No-SCS | LR-SCS :<br>No-SCS | No-SCS :<br>No-SNI | DTMP :<br>No-SCS | LR-SCS :<br>No-SCS |
| C9           | 2.01               | 0.25             | 0.47               | 6.6E-06            | 8.3E-06          | 8.0E-06            |
| C3           | 1.40               | 0.39             | 0.57               | 3.7E-13            | 1.3E-28          | 2.9E-23            |
| ITGA1        | 1.39               | 0.70             | 0.74               | 4.0E-03            | 6.1E-03          | 3.1E-02            |
| CD36         | 1.38               | 0.49             | 0.49               | 3.9E-02            | 8.8E-03          | 1.1E-02            |
| SERPINF2     | 1.38               | 0.44             | 0.57               | 5.4E-02            | 2.6E-04          | 6.4E-04            |
| FBLN1        | 1.37               | 0.36             | 0.72               | 1.8E-02            | 5.9E-03          | 4.2E-02            |
| IQGAP1       | 1.30               | 0.55             | 0.72               | 1.3E-07            | 1.3E-08          | 7.5E-07            |
| TF           | 1.28               | 0.45             | 0.60               | 1.1E-08            | 4.1E-21          | 6.6E-15            |
| APOE         | 1.27               | 0.53             | 0.58               | 4.7E-06            | 8.1E-09          | 5.2E-06            |
| NG2          | 1.24               | 0.81             | 0.83               | 1.1E-04            | 1.4E-03          | 1.4E-03            |
| CNTF         | 1.23               | 0.46             | 0.88               | 2.7E-02            | 9.5E-04          | 1.3E-01            |
| XDH          | 1.23               | 0.68             | 0.88               | 3.1E-02            | 1.3E-02          | 5.3E-02            |
| PYCARD       | 1.21               | 0.63             | 1.15               | 1.2E-02            | 2.2E-03          | 2.6E-02            |
| VINEXIN      | 1.20               | 0.78             | 0.86               | 3.4E-04            | 3.3E-03          | 8.3E-03            |
| CD45 iso 1   | 1.17               | 0.53             | 0.91               | 2.7E-01            | 7.2E-03          | 6.1E-01            |
| P47PHOX      | 1.16               | 0.51             | 1.00               | 3.9E-02            | 6.7E-04          | 8.9E-01            |
| NRG1         | 1.15               | 0.46             | 0.60               | 2.0E-02            | 7.8E-06          | 3.6E-05            |
| ROCK1        | 1.15               | 0.85             | 0.86               | 6.9E-03            | 1.5E-02          | 7.2E-02            |
| GBA          | 1.13               | 0.88             | 0.90               | 6.6E-03            | 5.5E-03          | 5.6E-02            |
| FGF2         | 1.12               | 0.77             | 0.96               | 8.4E-02            | 2.3E-02          | 8.7E-03            |
| DYSTROPHIN   | 1.12               | 0.74             | 0.92               | 1.3E-04            | 1.4E-04          | 1.7E-01            |
| MYH9         | 1.09               | 0.69             | 0.85               | 2.4E-04            | 5.2E-20          | 3.5E-07            |
| CDK5RAP3     | 1.09               | 0.84             | 0.98               | 1.2E-01            | 2.7E-02          | 7.7E-01            |
| DAG1         | 1.08               | 0.75             | 0.92               | 3.6E-01            | 2.5E-02          | 4.6E-01            |
| PXN          | 1.06               | 0.74             | 0.97               | 3.5E-01            | 6.5E-03          | 8.6E-01            |
| PTPN1        | 1.06               | 0.79             | 1.06               | 2.7E-01            | 4.2E-02          | 2.1E-01            |
| SHP-1        | 1.05               | 0.62             | 1.19               | 1.9E-01            | 1.1E-02          | 1.6E-01            |
| WNK2         | 1.04               | 1.08             | 1.02               | 4.9E-01            | 7.2E-03          | 3.4E-01            |
| ILK          | 1.04               | 0.81             | 0.94               | 4.3E-01            | 9.6E-04          | 2.6E-01            |
| CHI3L1 iso 2 | 1.03               | 0.43             | 0.72               | 8.0E-01            | 4.9E-02          | 1.3E-02            |
| NMDAR2B      | 1.03               | 0.95             | 0.82               | 7.6E-01            | 8.6E-03          | 2.3E-01            |
| NF1          | 1.02               | 1.02             | 1.03               | 3.1E-01            | 4.1E-03          | 5.9E-02            |
| EZRIN        | 1.02               | 0.82             | 1.02               | 6.3E-01            | 4.0E-05          | 3.5E-01            |
| TSC2         | 1.01               | 1.06             | 1.04               | 8.8E-01            | 3.5E-02          | 4.7E-01            |
| NRXN1        | 1.01               | 1.07             | 1.00               | 9.4E-01            | 4.1E-02          | 7.6E-01            |
| EMC10        | 1.00               | 1.08             | 1.09               | 9.9E-01            | 2.9E-02          | 5.6E-02            |
| TAPBP iso 2  | 1.00               | 1.14             | 0.98               | 9.8E-01            | 5.6E-03          | 9.4E-01            |
| IGBP1        | 1.00               | 1.12             | 1.28               | 9.3E-01            | 2.6E-02          | 5.9E-02            |
| SORL1        | 0.99               | 1.12             | 1.00               | 7.3E-01            | 1.5E-03          | 7.0E-01            |
| NQO2         | 0.99               | 1.14             | 1.12               | 8.1E-01            | 6.6E-04          | 1.9E-03            |
| MADD         | 0.99               | 1.09             | 1.01               | 7.3E-01            | 2.4E-03          | 6.5E-01            |

|              |      |      |      |         |         |         |
|--------------|------|------|------|---------|---------|---------|
| PKCD         | 0.99 | 1.05 | 1.18 | 7.9E-01 | 4.4E-02 | 4.4E-02 |
| TRAF3        | 0.97 | 1.08 | 0.99 | 2.5E-01 | 1.2E-05 | 9.5E-01 |
| CDH2         | 0.96 | 1.09 | 1.05 | 3.8E-01 | 1.5E-02 | 4.2E-01 |
| GLUR6        | 0.95 | 1.15 | 1.12 | 4.1E-01 | 7.2E-03 | 5.7E-02 |
| PLCB1        | 0.95 | 1.13 | 1.02 | 2.5E-01 | 1.2E-03 | 3.6E-01 |
| HMGB1        | 0.95 | 0.86 | 0.92 | 3.2E-01 | 2.1E-02 | 1.0E-01 |
| HSP105       | 0.95 | 1.07 | 0.95 | 1.8E-01 | 2.7E-02 | 3.4E-01 |
| NCAM-L1 iso2 | 0.95 | 1.11 | 1.08 | 2.6E-01 | 1.3E-02 | 1.1E-01 |
| MAGI3        | 0.95 | 1.13 | 1.04 | 1.3E-01 | 4.1E-02 | 2.1E-01 |
| PAFAH1B1     | 0.94 | 1.03 | 1.01 | 1.2E-01 | 1.9E-02 | 5.5E-01 |
| SEMA7A       | 0.93 | 0.85 | 1.16 | 1.2E-01 | 5.1E-03 | 1.9E-02 |
| HRAS         | 0.92 | 1.13 | 1.11 | 1.3E-01 | 8.3E-03 | 1.1E-02 |
| TNIK         | 0.92 | 1.18 | 1.21 | 7.9E-02 | 1.1E-02 | 4.4E-02 |
| APP          | 0.92 | 1.06 | 1.08 | 1.6E-02 | 6.2E-03 | 3.3E-02 |
| CAMK2D       | 0.92 | 1.16 | 1.10 | 7.8E-02 | 1.4E-03 | 7.5E-02 |
| ARRB1        | 0.91 | 1.18 | 1.10 | 3.8E-01 | 3.9E-02 | 2.6E-01 |
| MGLUR5       | 0.91 | 1.22 | 1.15 | 1.1E-02 | 6.0E-04 | 1.1E-03 |
| PAK3         | 0.91 | 1.12 | 1.12 | 6.0E-02 | 3.6E-04 | 7.7E-03 |
| G-ALPHA i2   | 0.90 | 1.07 | 1.14 | 1.2E-02 | 1.7E-02 | 2.9E-03 |
| UCHL1        | 0.90 | 1.05 | 1.07 | 1.3E-02 | 4.9E-02 | 1.3E-01 |
| MGLUR1       | 0.90 | 1.08 | 1.04 | 3.4E-02 | 7.4E-03 | 5.0E-01 |
| NEUROPLASTIN | 0.89 | 1.15 | 1.01 | 5.4E-02 | 1.5E-02 | 7.5E-01 |
| MKL1         | 0.88 | 1.09 | 1.14 | 1.1E-02 | 2.4E-02 | 3.1E-02 |
| PKCE         | 0.88 | 1.18 | 1.18 | 1.6E-02 | 3.8E-03 | 3.1E-02 |
| PHB          | 0.86 | 1.10 | 1.08 | 1.3E-02 | 4.2E-02 | 2.4E-01 |
| NPY          | 0.85 | 1.55 | 1.70 | 1.2E-01 | 2.1E-02 | 3.2E-02 |
| CDC42        | 0.85 | 1.14 | 1.17 | 1.2E-01 | 2.2E-02 | 2.3E-02 |
| SASH1        | 0.84 | 1.22 | 1.12 | 1.4E-01 | 3.9E-02 | 3.1E-01 |
| PSAP         | 0.82 | 1.28 | 1.42 | 1.5E-03 | 1.2E-03 | 1.0E-03 |
| KRAS         | 0.82 | 1.20 | 1.23 | 1.9E-03 | 3.9E-03 | 5.7E-03 |
| THBS1        | 0.80 | 0.42 | 0.67 | 7.4E-04 | 2.6E-05 | 9.0E-05 |
| ABCA7        | 0.79 | 1.65 | 1.54 | 1.8E-01 | 1.8E-02 | 2.1E-01 |
| FN1          | 0.78 | 0.37 | 0.67 | 7.4E-13 | 1.1E-21 | 4.8E-14 |
| KHS1         | 0.77 | 1.38 | 1.43 | 4.3E-02 | 1.9E-02 | 1.8E-01 |
| GPR37L1      | 0.77 | 1.30 | 1.24 | 1.2E-02 | 2.3E-02 | 3.6E-02 |
| SOD1         | 0.71 | 1.60 | 2.44 | 2.3E-03 | 4.2E-04 | 4.2E-06 |
| RAP1A        | 0.71 | 1.32 | 1.39 | 1.5E-02 | 2.4E-03 | 6.4E-03 |
| FGA iso 1    | 0.52 | 0.32 | 0.70 | 4.1E-16 | 6.7E-19 | 2.2E-07 |
| FGG          | 0.45 | 0.37 | 0.78 | 1.2E-08 | 6.0E-13 | 1.1E-04 |
| FGB          | 0.41 | 0.35 | 0.75 | 1.0E-14 | 3.2E-18 | 1.4E-05 |

**Supplementary Table 3.** Fold changes in expression levels of all isoforms of 90 phosphoproteins enriched in in NFκB signaling.

| Phosphoprotein isoform   | No-SCS : | DTMP : | LR-SCS : |
|--------------------------|----------|--------|----------|
|                          | No-SNI   | No-SCS | No-SCS   |
| p-PDK1 (244)             | 0.89     | 1.20   | 0.90     |
| p-JIP3 (201)             | 0.59     | 1.13   | 1.84     |
| p-JIP3 (und)             | 0.98     | 0.63   | 0.77     |
| p-JIP3 (und)             | 1.07     | 0.84   | 0.55     |
| p-JIP3 (und)             | 0.65     | 1.13   | 0.31     |
| p-JIP3 (und)             | 0.47     | 1.19   | 1.55     |
| p-JIP3 (und)             | 0.58     | 1.28   | 2.35     |
| p-JIP3 (und)             | 0.62     | 1.43   | 2.76     |
| p-JIP3 (662)             | 1.29     | 0.69   | 0.32     |
| p-CAMKK1 (458)           | 1.16     | 0.92   | 0.92     |
| p-CAMKK1 (475)           | 0.94     | 1.28   | 1.41     |
| p-CAMKK1 (74)            | 0.71     | 0.46   | 0.18     |
| p-CAMKK1 (100)           | 0.85     | 1.06   | 0.72     |
| p-CAMKK1 (492)           | 0.87     | 0.93   | 0.99     |
| p-PPM1H (122)            | 1.00     | 0.87   | 1.01     |
| p-PPM1H (210)            | 1.10     | 0.84   | 0.71     |
| p-PPP1R14A (128)         | 1.14     | 0.24   | 0.76     |
| p-PPP1R14A (136)         | 1.02     | 0.73   | 0.80     |
| p-PPP1R14A (26)          | 0.17     | 2.78   | 4.45     |
| p-MARK1 (633)            | 0.25     | 3.24   | 4.78     |
| p-MARK1 (und)            | 0.93     | 1.07   | 1.03     |
| p-MARK1 (und)            | 0.79     | 1.56   | 2.56     |
| p-MARK1 (394,446)        | 0.50     | 2.17   | 2.13     |
| p-MARK1 (403,455)        | 0.59     | 1.43   | 1.71     |
| p-MARK1 (423,475)        | 0.76     | 1.24   | 1.95     |
| p-MARK1 (613,666)        | 1.15     | 4.69   | 7.01     |
| p-PPP1R12C (361)         | 0.95     | 1.29   | 1.15     |
| p-PPP1R12C (und)         | 1.15     | 0.70   | 0.67     |
| p-neurabin 1 (192)       | 0.32     | 0.43   | 2.94     |
| p-neurabin 1 (372)       | 0.87     | 0.96   | 0.78     |
| p-neurabin 1 (und)       | 0.62     | 0.87   | 1.34     |
| p-neurabin 1 (365,371)   | 0.29     | 6.61   | 4.52     |
| p-TAO1 (9)               | 0.34     | 0.48   | 3.18     |
| p-TAO1 (445)             | 2.32     | 0.44   | 1.59     |
| p-LKB1 (31)              | 0.37     | 1.51   | 2.79     |
| p-GSK3B (9)              | 0.38     | 2.44   | 4.64     |
| p-PPP1CC iso 2 (311;295) | 0.39     | 0.35   | 0.77     |
| p-PPP1R3D (54,58)        | 0.40     | 1.88   | 2.05     |
| p-PPP1R3D (58)           | 1.30     | 1.90   | 2.42     |
| p-PPP1R3D (25)           | 1.19     | 1.21   | 0.73     |
| p-ERK4 (186)             | 1.44     | 0.86   | 0.83     |

|                     |      |      |       |
|---------------------|------|------|-------|
| p-ERK4 (430)        | 1.16 | 0.80 | 0.94  |
| p-Spinophilin (100) | 0.52 | 1.22 | 1.33  |
| p-PKCG (330)        | 0.69 | 1.12 | 1.34  |
| p-PKCG (687)        | 0.62 | 1.57 | 1.92  |
| p-PKCG (689)        | 0.95 | 1.63 | 3.06  |
| p-PKCG (639;690)    | 0.42 | 1.80 | 1.63  |
| p-PKCB iso 2 (642)  | 1.02 | 1.01 | 0.73  |
| p-p70S6K (447)      | 0.45 | 1.58 | 2.34  |
| p-SNIP (1021)       | 0.72 | 1.26 | 1.16  |
| p-SNIP (1077)       | 0.71 | 1.31 | 1.49  |
| p-SNIP (200)        | 0.44 | 2.00 | 2.32  |
| p-SNIP (260)        | 0.88 | 1.09 | 1.03  |
| p-SNIP (367,374)    | 0.45 | 3.31 | 10.42 |
| p-SNIP (374)        | 0.74 | 1.45 | 1.49  |
| p-SNIP (374,378)    | 0.54 | 1.78 | 3.13  |
| p-SNIP (375)        | 0.45 | 1.68 | 0.46  |
| p-SNIP (375,378)    | 0.53 | 1.86 | 3.39  |
| p-SNIP (378)        | 0.77 | 1.39 | 1.33  |
| p-SNIP (534)        | 0.69 | 1.24 | 1.78  |
| p-SNIP (547)        | 1.08 | 1.00 | 0.79  |
| p-SNIP (556)        | 0.76 | 1.33 | 1.46  |
| p-SNIP (98)         | 0.80 | 2.11 | 1.44  |
| p-SNIP (1037)       | 0.74 | 1.13 | 1.22  |
| p-SNIP (1152)       | 2.81 | 1.54 | 1.66  |
| p-SNIP (333;336)    | 0.96 | 1.03 | 1.28  |
| p-SNIP (und)        | 0.79 | 1.29 | 1.36  |
| p-SNIP (und)        | 0.53 | 1.56 | 1.81  |
| p-SNIP (341,359)    | 0.35 | 1.56 | 0.05  |
| p-SNIP (342;353)    | 0.71 | 1.14 | 0.91  |
| p-SNIP (357;359)    | 0.66 | 1.61 | 1.22  |
| p-SNIP (399)        | 0.49 | 2.14 | 2.39  |
| p-SNIP (507;508)    | 0.82 | 1.14 | 1.43  |
| p-SNIP (527, 537)   | 0.69 | 1.24 | 1.78  |
| p-SNIP (534)        | 0.87 | 1.33 | 1.77  |
| p-SNIP (537)        | 0.50 | 1.70 | 1.60  |
| p-SNIP (542)        | 1.36 | 0.88 | 0.47  |
| p-SNIP (655)        | 0.57 | 2.40 | 1.50  |
| p-SNIP (878)        | 0.80 | 0.41 | 0.29  |
| p-p90RSK (363;369)  | 0.50 | 1.52 | 1.53  |
| p-p90RSK (221;227)  | 1.40 | 0.86 | 1.36  |
| p-ERK2 (183;185)    | 1.34 | 0.64 | 0.71  |
| p-ERK2 (183)        | 2.08 | 1.18 | 0.99  |
| p-ERK2 (185)        | 0.52 | 1.78 | 2.38  |
| p-FAK (843)         | 0.63 | 0.77 | 1.72  |
| p-FAK (913)         | 0.66 | 1.28 | 1.48  |
| p-FAK (928)         | 0.54 | 1.75 | 1.22  |
| p-TAO2 iso2 (9)     | 0.55 | 0.29 | 0.50  |

|                          |      |      |      |
|--------------------------|------|------|------|
| p-DARPP-32 (34)          | 0.57 | 2.84 | 5.12 |
| p-DARPP-32 (45,46)       | 2.07 | 0.49 | 1.05 |
| p-DARPP-32 (102)         | 1.86 | 0.60 | 0.96 |
| p-PKAR1A (77, 83;77, 83) | 0.74 | 1.16 | 1.18 |
| p-PKAR1A (83)            | 1.30 | 0.90 | 0.95 |
| p-MAPKAPK2 (208)         | 0.63 | 1.13 | 1.45 |
| p-NKAP (139;147)         | 0.64 | 1.28 | 1.90 |
| p-PPP1R3G (81)           | 0.65 | 1.46 | 1.01 |
| p-MKK4 (389)             | 1.44 | 0.91 | 0.69 |
| p-MKK4 (389, 391)        | 0.67 | 1.40 | 2.79 |
| p-MKK4 (88)              | 1.12 | 1.16 | 0.85 |
| p-MKK4 (255)             | 1.31 | 0.56 | 0.73 |
| p-MKK4 (391, 392)        | 1.88 | 0.62 | 1.32 |
| p-MKK4 (392;395)         | 0.73 | 0.86 | 1.23 |
| p-MKK4 (78)              | 1.46 | 0.75 | 0.96 |
| p-PPM1E (532)            | 0.84 | 1.26 | 0.89 |
| p-PPM1E (532, 545)       | 0.69 | 1.40 | 2.20 |
| p-PPM1E (545)            | 0.81 | 1.39 | 1.29 |
| p-PPM1E (550;551)        | 0.77 | 1.08 | 1.04 |
| p-SIN1 (510)             | 0.69 | 1.19 | 2.26 |
| p-LZK (678)              | 0.71 | 1.66 | 1.23 |
| p-ASK1 (1040)            | 0.73 | 0.77 | 0.90 |
| p-Raptor (722)           | 0.78 | 1.55 | 3.01 |
| p-Raptor (859, 863)      | 0.82 | 1.14 | 2.26 |
| p-Raptor (859)           | 0.85 | 1.03 | 0.91 |
| p-JNK3 (221)             | 1.15 | 1.06 | 1.55 |
| p-JNK3 (223)             | 0.66 | 0.88 | 0.92 |
| p-MEKK2 (239)            | 1.29 | 0.87 | 1.10 |
| p-MEKK2 (331)            | 0.83 | 0.14 | 1.38 |
| p-MAP2K7 (403;419)       | 0.84 | 1.72 | 1.77 |
| p-MEK1 (386)             | 0.94 | 1.27 | 2.48 |
| p-ARPP-21 iso 2 (381)    | 0.80 | 1.24 | 1.30 |
| p-GCK (257;289;298)      | 1.07 | 1.08 | 0.61 |
| p-MSK1 (und)             | 1.04 | 0.73 | 0.75 |
| p-PKACB (264)            | 0.96 | 2.20 | 3.28 |
| p-PKAR2A (97)            | 1.03 | 1.17 | 0.98 |
| p-PPP1CA (320)           | 1.07 | 0.92 | 0.69 |
| p-RSKL1 (und)            | 1.43 | 0.96 | 0.89 |
| p-RSKL1 (und)            | 1.58 | 1.07 | 0.91 |
| p-RSKL1 (und)            | 1.03 | 0.87 | 1.56 |
| p-RSKL1 (594)            | 0.94 | 0.98 | 0.97 |
| p-RSKL1 (und)            | 1.09 | 1.34 | 0.84 |
| p-RSKL1 (und)            | 0.93 | 0.84 | 1.30 |
| p-MYPT1 (997)            | 0.76 | 0.70 | 1.59 |
| p-MYPT1 (299)            | 0.95 | 1.82 | 3.39 |
| p-MYPT1 (445)            | 1.36 | 1.14 | 2.06 |
| p-MYPT1 (409)            | 1.13 | 0.72 | 0.15 |

|                            |      |      |      |
|----------------------------|------|------|------|
| p-PKCH (656)               | 1.24 | 0.57 | 0.22 |
| p-14-3-3 theta (232)       | 1.28 | 0.68 | 0.64 |
| p-GFAP (12)                | 1.66 | 1.35 | 2.51 |
| p-GFAP (148)               | 6.40 | 0.64 | 0.58 |
| p-GFAP (267)               | 0.91 | 0.94 | 1.77 |
| p-GFAP (303)               | 1.51 | 0.23 | 0.34 |
| p-GFAP (321)               | 1.30 | 0.84 | 1.15 |
| p-GFAP (36)                | 2.15 | 0.76 | 0.97 |
| p-GFAP (36, 41)            | 0.89 | 1.06 | 1.67 |
| p-GFAP (383)               | 1.02 | 0.91 | 1.34 |
| p-GFAP (41)                | 1.04 | 1.33 | 1.84 |
| p-GFAP (13)                | 0.83 | 2.47 | 4.17 |
| p-GFAP (15)                | 1.01 | 1.36 | 2.93 |
| p-GFAP (296)               | 1.43 | 1.44 | 2.17 |
| p-GFAP (31)                | 2.46 | 0.96 | 2.21 |
| p-GFAP (319)               | 2.11 | 0.69 | 0.98 |
| p-GFAP (38)                | 1.20 | 1.25 | 1.46 |
| p-GFAP (391)               | 1.78 | 0.98 | 1.74 |
| p-GFAP (398)               | 1.61 | 0.85 | 1.58 |
| p-PKCA (226)               | 0.93 | 0.85 | 0.88 |
| p-PKCA (497)               | 1.41 | 0.13 | 0.31 |
| p-PKCA (504)               | 1.91 | 0.88 | 2.38 |
| p-PKCA (638)               | 0.11 | 0.96 | 4.19 |
| p-MSK2 (745)               | 1.27 | 2.00 | 0.53 |
| p-MSK2 (682)               | 1.41 | 0.14 | 0.80 |
| p-AKT1 (124, 129;124, 129) | 2.12 | 1.23 | 1.34 |
| p-AKT1 (124)               | 1.47 | 0.97 | 0.97 |
| p-AKT1 (122)               | 1.42 | 1.02 | 1.15 |
| p-PPP1R13B (und)           | 0.98 | 1.06 | 0.88 |
| p-KHS1 (304)               | 0.86 | 1.08 | 0.87 |
| p-MEK2 (393,394)           | 1.29 | 0.74 | 1.09 |
| p-MEK2 (394)               | 1.16 | 0.58 | 1.36 |
| p-BRAF (und)               | 0.89 | 1.13 | 1.36 |
| p-BRAF (und)               | 1.48 | 0.80 | 0.43 |
| p-BRAF (483;484)           | 1.09 | 1.09 | 0.93 |
| p-PKCT (307)               | 1.19 | 1.16 | 2.35 |
| p-PKCT (676)               | 1.62 | 0.64 | 0.83 |
| p-PKCI (412)               | 1.63 | 0.88 | 0.85 |
| p-MEKK4 (1031)             | 1.64 | 0.30 | 1.14 |
| p-AKT3 (34)                | 1.68 | 0.75 | 0.80 |
| p-AKT3 (120)               | 0.94 | 1.04 | 0.55 |
| p-14-3-3 zeta (110)        | 1.69 | 0.47 | 0.09 |
| p-YAP1 iso3 (und)          | 1.41 | 0.91 | 0.90 |
| p-YAP1 iso3 (112)          | 5.44 | 0.56 | 0.60 |
| p-YAP1 iso3 (113)          | 3.24 | 0.54 | 0.52 |
| p-YAP1 iso3 (94)           | 1.69 | 0.23 | 0.19 |
| p-YAP1 iso3 (95)           | 1.74 | 1.01 | 0.98 |



|                          |      |      |      |
|--------------------------|------|------|------|
| p-mTOR (1261)            | 1.71 | 0.55 | 1.03 |
| p-TAK1 (439)             | 0.99 | 0.92 | 0.97 |
| p-TSC2 (1254)            | 1.11 | 1.06 | 0.82 |
| p-TSC2 (1413)            | 1.08 | 0.85 | 1.93 |
| p-TSC2 (und)             | 1.85 | 0.98 | 0.57 |
| p-TSC2 (und)             | 0.97 | 0.76 | 0.74 |
| p-TSC2 (und)             | 0.57 | 1.53 | 1.61 |
| p-TSC2 (und)             | 0.84 | 0.69 | 0.74 |
| p-TSC2 (939)             | 1.02 | 1.09 | 1.50 |
| p-PPP1CB (311;316)       | 1.80 | 0.95 | 0.72 |
| p-HGK iso3 (566)         | 0.96 | 0.97 | 1.49 |
| p-HGK iso3 (und)         | 1.80 | 0.70 | 1.62 |
| p-HGK iso3 (und)         | 0.80 | 1.15 | 2.76 |
| p-HGK iso3 (839)         | 1.65 | 0.96 | 2.51 |
| p-PPP1R7 (12, 24;12, 24) | 1.29 | 1.35 | 0.36 |
| p-PPP1R7 (12, 27;12, 27) | 1.22 | 0.92 | 1.30 |
| p-PPP1R7 (12)            | 1.33 | 0.85 | 0.68 |
| p-PPP1R7 (24, 27;24, 27) | 1.88 | 0.73 | 0.78 |
| p-PPP1R7 (44, 47;44, 47) | 1.61 | 0.78 | 0.84 |
| p-PPP1R7 (44)            | 1.32 | 1.05 | 0.63 |
| p-PPP1R7 (47)            | 0.93 | 0.91 | 1.15 |
| p-PKCZ (und)             | 1.92 | 0.85 | 0.68 |
| p-PPM1G (524)            | 1.96 | 1.34 | 0.43 |
| p-STAT3 (714)            | 0.75 | 1.06 | 1.09 |
| p-STAT3 (727)            | 0.79 | 0.96 | 1.32 |
| p-STAT3 (705)            | 2.03 | 0.48 | 1.26 |
| p-PPP1R2 (87)            | 0.89 | 0.84 | 0.57 |
| p-PPP1R2 (175,177)       | 2.18 | 0.59 | 0.28 |
| p-PKAR2B (83,85)         | 1.52 | 0.79 | 0.88 |
| p-PKAR2B (112)           | 1.38 | 1.00 | 0.98 |
| p-PKCE (329)             | 0.68 | 1.12 | 0.88 |
| p-PKCE (346, 349)        | 1.20 | 1.16 | 1.18 |
| p-PKCE (368)             | 0.89 | 1.20 | 1.35 |
| p-PKCE (388)             | 1.26 | 1.01 | 1.36 |
| p-MST1 (320)             | 2.90 | 0.34 | 0.30 |
| p-DEPTOR (und)           | 2.91 | 0.73 | 1.03 |
| p-DEPTOR (und)           | 0.87 | 1.23 | 1.47 |
| p-PKAR1B (und)           | 3.10 | 0.41 | 0.94 |
| p-PKAR1B (61)            | 0.81 | 1.98 | 1.44 |
| p-PRAS40 (und)           | 0.84 | 0.72 | 0.55 |
| p-PRAS40 (und)           | 1.31 | 0.42 | 0.56 |
| p-PRAS40 (und)           | 0.75 | 0.65 | 0.60 |
| p-PRAS40 (und)           | 3.20 | 0.59 | 0.72 |
| p-ARAF iso 1 (580;621)   | 3.25 | 1.23 | 3.27 |
| p-PPP1R11 (78;57)        | 3.89 | 0.83 | 0.42 |
| p-MAP3K12 (43)           | 3.98 | 0.77 | 1.44 |
| p-CFH (885)              | 4.20 | 0.37 | 0.61 |

|                        |       |      |      |
|------------------------|-------|------|------|
| p-CFH (886)            | 3.49  | 0.53 | 1.08 |
| p-Lamtor1 (28)         | 1.01  | 1.04 | 0.97 |
| p-Lamtor1 (39)         | 4.62  | 0.35 | 0.66 |
| p-14-3-3 epsilon (210) | 0.71  | 0.60 | 1.18 |
| p-PKCD (643)           | 0.99  | 1.13 | 1.37 |
| p-PKCD (662)           | 5.19  | 0.77 | 0.64 |
| p-ERK1 (203)           | 7.59  | 1.03 | 1.17 |
| p-ERK1 (203, 205)      | 4.28  | 0.53 | 0.41 |
| p-ERK1 (205)           | 0.72  | 1.08 | 2.55 |
| p-RICTOR (und)         | 0.56  | 1.54 | 2.20 |
| p-RICTOR (und)         | 0.59  | 1.16 | 1.10 |
| p-Vimentin (325)       | 2.48  | 0.24 | 0.14 |
| p-Vimentin (39)        | 3.37  | 1.15 | 2.55 |
| p-Vimentin (430)       | 20.22 | 0.06 | 0.75 |
| p-Vimentin (459)       | 11.48 | 0.45 | 0.96 |
| p-Vimentin (51)        | 3.74  | 0.71 | 1.70 |
| p-Vimentin (56)        | 3.63  | 0.60 | 1.39 |
| p-Vimentin (73)        | 5.14  | 0.62 | 0.98 |
| p-Vimentin (10)        | 3.57  | 0.91 | 1.39 |
| p-Vimentin (18)        | 5.19  | 0.54 | 1.28 |
| p-Vimentin (436)       | 3.93  | 0.76 | 1.37 |
| p-Vimentin (48)        | 1.59  | 0.84 | 1.26 |
| p-Vimentin (7)         | 7.61  | 0.61 | 1.38 |
| p-AP1B1 (603, 605)     | 1.41  | 0.55 | 0.07 |
| p-JUND (73)            | 1.21  | 0.82 | 1.34 |

**Supplementary Table 4.** Fold changes of phosphoproteins associated with MAP kinase cascade

| Phosphoprotein isoform              | No-SCS :<br>No-SNI | DTMP :<br>No-SCS | LR-SCS :<br>No-SCS |
|-------------------------------------|--------------------|------------------|--------------------|
| p-GCK (257;289;298)                 | 1.07               | 1.08             | 0.61               |
| p-HGK (und)                         | 0.80               | 1.15             | 2.76               |
| p-HGK (566)                         | 0.96               | 1.03             | 1.49               |
| p-HGK (839)                         | 1.65               | 0.87             | 2.51               |
| p-HGK (und)                         | 1.80               | 0.70             | 1.62               |
| p-KHS1 (304)                        | 0.86               | 1.15             | 0.87               |
| p-MEKK2 (331)                       | 0.83               | 0.14             | 1.38               |
| p-MEKK2 (239)                       | 1.29               | 0.87             | 1.10               |
| p-MEKK4 (1031)                      | 1.64               | 0.30             | 1.14               |
| p-MAP3K12 (43)                      | 3.98               | 0.77             | 1.44               |
| p-TAO1 (9)                          | 0.34               | 0.48             | 3.18               |
| p-TAO1 (445)                        | 2.32               | 0.44             | 1.59               |
| p-TAO2 (9)                          | 0.55               | 0.29             | 0.50               |
| p-ARAF (580;621)                    | 3.25               | 1.23             | 3.27               |
| p-BRAF (167;134)                    | 0.89               | 1.13             | 1.36               |
| p-BRAF (483;484)                    | 1.09               | 1.09             | 0.93               |
| p-BRAF (und)                        | 1.48               | 0.80             | 0.43               |
| p-LZK (678)                         | 0.71               | 1.66             | 1.23               |
| p-ASK (1040)                        | 0.73               | 0.77             | 0.90               |
| p-TAK1 (439)                        | 0.99               | 0.92             | 0.97               |
| p-MEK1 (386)                        | 0.94               | 1.27             | 2.48               |
| p-MEK2 (394)                        | 1.16               | 0.58             | 1.36               |
| p-MEK2 (393;394)                    | 1.29               | 0.74             | 1.09               |
| p-MKK4 (389, 391)                   | 0.67               | 1.40             | 2.79               |
| p-MKK4 (392;395)                    | 0.73               | 0.86             | 1.23               |
| p-MKK4 (88)                         | 1.12               | 1.16             | 0.85               |
| p-MKK4 (255)                        | 1.31               | 0.56             | 0.73               |
| p-MKK4 (389)                        | 1.44               | 0.91             | 0.69               |
| p-MKK4 (78)                         | 1.46               | 0.75             | 0.96               |
| p-MKK4 (391, 392)                   | 1.88               | 0.62             | 1.32               |
| p-MAP2K7 (403;419)                  | 0.84               | 1.72             | 1.77               |
| p-JNK3 (223;185)                    | 0.66               | 0.88             | 0.92               |
| p-JNK3 (221, 223;221, 223;183, 185) | 1.15               | 1.06             | 1.55               |
| p-ERK1 (205)                        | 0.72               | 1.19             | 2.55               |
| p-ERK1 (203, 205)                   | 4.28               | 0.53             | 0.41               |
| p-ERK1 (203)                        | 7.59               | 0.42             | 1.17               |
| p-ERK2 (185)                        | 0.52               | 1.78             | 2.38               |
| p-ERK2 (183, 185;183, 185)          | 1.34               | 0.64             | 0.71               |
| p-ERK2 (183)                        | 2.08               | 1.18             | 0.99               |
| p-ERK4 (430)                        | 1.16               | 0.80             | 0.94               |
| p-ERK4 (186)                        | 1.44               | 0.86             | 0.83               |
| p-p70S6K (447)                      | 0.45               | 1.58             | 2.34               |
| p-p90RSK (363;369)                  | 0.50               | 1.52             | 1.53               |

|                          |      |      |      |
|--------------------------|------|------|------|
| p-p90RSK (221;227)       | 1.40 | 0.86 | 1.36 |
| p-RSKL1 (und)            | 0.93 | 0.84 | 1.30 |
| p-RSKL1 (594)            | 0.94 | 0.98 | 0.97 |
| p-RSKL1 (und)            | 1.03 | 0.87 | 1.56 |
| p-RSKL1 (und)            | 1.09 | 1.34 | 0.84 |
| p-RSKL1 (und)            | 1.43 | 0.96 | 0.89 |
| p-RSKL1 (und)            | 1.58 | 1.07 | 0.91 |
| p-MSK1 (517;719;773;797) | 1.04 | 0.73 | 0.75 |
| p-MSK2 (745)             | 1.27 | 2.00 | 0.53 |
| p-MSK2 (682)             | 1.41 | 0.22 | 0.80 |
| p-MAPKAPK2 (208)         | 0.63 | 1.13 | 1.45 |
| p-SIN1 (510)             | 0.69 | 1.19 | 2.26 |
| p-JIP3 (und)             | 0.47 | 1.19 | 1.55 |
| p-JIP3 (und)             | 0.58 | 1.28 | 2.35 |
| p-JIP3 (201)             | 0.59 | 1.13 | 1.84 |
| p-JIP3 (und)             | 0.62 | 1.43 | 2.76 |
| p-JIP3 (und)             | 0.65 | 1.13 | 0.31 |
| p-JIP3 (und)             | 0.98 | 0.63 | 0.77 |
| p-JIP3 (und)             | 1.07 | 0.84 | 0.55 |
| p-JIP3 (662)             | 1.29 | 0.69 | 0.32 |
